# Supplementary material for: pH-dependent hydrogen evolution using spatially confined ruthenium on hollow N-doped carbon nanocages as a Mott–Schottky catalyst
Source: Royal Society of Chemistry journal article supplement (doi:10.1039/d1ta02375f), 2021-01-01
Supplement: d1ta02375f1.pdf [file d1ta02375f1.pdf]

## Supporting Information

### **pH-dependent Hydrogen Evolution by Spatially Confined Ruthenium on Hollow N-doped Carbon Nanocages as Mott-Schottky Catalyst**

Bidushi Sarkar<sup>†a</sup>, Debanjan Das<sup>†a</sup> and Karuna Kar Nanda<sup>\*a</sup>

<sup>a</sup>Materials Research Centre, Indian Institute of Science, Bangalore-560012, India

\*E-mail: nanda@iisc.ac.in

## MATERIALS AND METHODS

### Chemicals

Zinc nitrate hexahydrate ( $\text{Zn}(\text{NO}_3)_2 \cdot 6\text{H}_2\text{O}$ ), 2- methyl imidazole ( $\text{CH}_3\text{C}_3\text{H}_2\text{N}_2\text{H}$ ), methanol and ruthenium acetylacetonate ( $(\text{C}_5\text{H}_7\text{O}_2)_3\text{Ru}$ ) were procured from Sigma-Aldrich and carbon black Vulcan XC-72. Millipore water obtained from a Merck Milli-Q system was used for the experiments.

### Material synthesis

*Synthesis of ZIF-8:* At room temperature, 1.46 g of zinc nitrate hexahydrate and 3.25 g of 2- methyl imidazole was dissolved in 50 mL of methanol separately. The 2- methyl imidazole solution was then added slowly into the zinc solution with continuous magnetic stirring for 15 min and was left undisturbed overnight to obtain a white solid. The solid was collected by centrifugation (5000 rpm), washed with methanol several times, and dried at 80 °C to get the ZIF-8 crystals.

*Synthesis of NC:* As synthesized, ZIF-8 (100 mg) was added in a close quartz tube and pyrolyzed at 900 °C for two h under  $\text{N}_2$  atmosphere in a Lenton tube furnace to form NC as the final product.

*Synthesis of Ru@NCN:* As synthesized ZIF-8, and ruthenium acetylacetonate  $\text{Ru}(\text{acac})_3$  were taken (weight ratio 3:1, respectively) and ground in mortar-pestle. The obtained powder was added into a one-end closed quartz tube and put to pyrolysis at 900 °C for two h under  $\text{N}_2$  atmosphere in a Lenton tube furnace. The resulted black product was named Ru@NCN. The catalyst with this precursor ratio is mentioned as Ru@NCN in the manuscript, unless specified.

Same procedure was followed with a different ZIF-8 to  $\text{Ru}(\text{acac})_3$  ratio as 2:1, and 5:1 to obtain Ru@NCN1 and Ru@NCN2, respectively.

*Synthesis of Ru@CB:* Commercial carbon black Vulcan XC-72 and ruthenium acetylacetonate were taken (weight ratio 3:1, respectively), ground well in mortar-pestle, and subjected to pyrolysis at 900 °C for 2 h under  $\text{N}_2$  atmosphere. The as-obtained product was named Ru@CB.

*Synthesis of Ru@Pt and Ru@Cu:* Metallic Ru (0.3 mg/cm<sup>2</sup> loading) is drop casted on a Pt working electrode (diameter, 2mm) to obtain Ru@Pt. Similarly, metallic Ru is electrodeposited on Cu foil in an area of 1 cm\*1 cm to obtain Ru@Cu.

## Material Characterizations

X-ray diffraction (XRD) data of as-prepared samples were collected at room temperature with a  $2\theta$  scan range of  $10\text{--}90^\circ$  using an X-ray diffractometer, PANalytical equipped with Cu  $K\alpha$  radiation ( $1.54 \text{ \AA}$ ). The XRD of samples after the HER studies were collected using Bruker D8 Advance. Raman spectra of the samples were recorded on a WITec system (excitation wavelength =  $532 \text{ nm}$ ). Thermogravimetric analysis (TGA) was done on TGA TA instruments (Q50 series) in nitrogen atmosphere. The specific Brunauer- Emmett-Teller (BET) surface area was evaluated using an Autosorb iQ, Quantachrome Instruments. The scanning electron microscopy (SEM) images were obtained using Karl Ziess Ultra 55 FE-SEM. The transmission electron microscopy (TEM) images, high-resolution TEM (HRTEM), high-angle annular dark-field imaging - scanning transmission electron microscopy (HAADF - STEM) and elemental mapping were carried out using FEI Titan Themis 300 at an accelerating voltage of  $300 \text{ kV}$ . X-ray photoelectron spectroscopy (XPS) was performed on Thermo Scientific ESCALAB 250 with a monochromatic Al  $K\alpha$  source ( $1486.6 \text{ eV}$ ). The calibration of all elements' binding energy was done by placing the C  $1s$  peak at  $284.6 \text{ eV}$ . The inductively coupled plasma mass spectrophotometry (ICPMS) was done on a quadrupole ICPMS Thermo X Series II.

## Electrochemical measurements

All the electrochemical measurements were carried out using a conventional three-electrode cell on a CHI 750E workstation. The commercial glassy carbon electrode (GCE,  $0.07 \text{ cm}^2$ ), saturated calomel electrode (SCE), and graphite rod as the working, reference, and counter electrode, respectively. To prepare the working electrode,  $2 \text{ mg}$  of catalyst was taken, added  $200 \text{ }\mu\text{L}$  of ethanol, and  $50 \text{ }\mu\text{L}$  of water followed by  $20 \text{ }\mu\text{L}$  of a  $5 \text{ wt } \%$  Nafion 117 solution. The as-prepared ink was sonicated for  $30 \text{ min}$  and  $2.5 \text{ }\mu\text{L}$  of the ink was drop-casted onto the GCE and air-dried (loading  $\sim 0.26 \text{ mg cm}^{-2}$ ). For comparison of activity, the commercial  $20 \text{ wt } \%$  Pt/C purchased from Johnson Matthey Co., HiSPEC™ 3000 was used. The potentials measured were converted to potential versus reversible hydrogen electrode (RHE) using the equation:  $E_{(vs \text{ RHE})} = E_{(vs \text{ SCE})} + E_{\text{SCE}^\circ} + 0.059 \text{ pH}$ . The measurements were carried out in  $1 \text{ M KOH}$ ,  $1 \text{ M H}_2\text{SO}_4$  and  $1 \text{ M}$  phosphate buffer saline (PBS) solution, respectively after purging with  $\text{N}_2$  gas for  $30 \text{ min}$ .

Electrochemical active surface area (ECSA) is evaluated using the double layer capacitance ( $C_{dl}$ ) using the following equation,

$$\text{ECSA} = C_{dl}/C_s$$

where  $C_s$  is the specific capacitance that is  $0.04$  and  $0.035 \text{ mF/cm}^2$  in alkaline and acidic media, respectively.

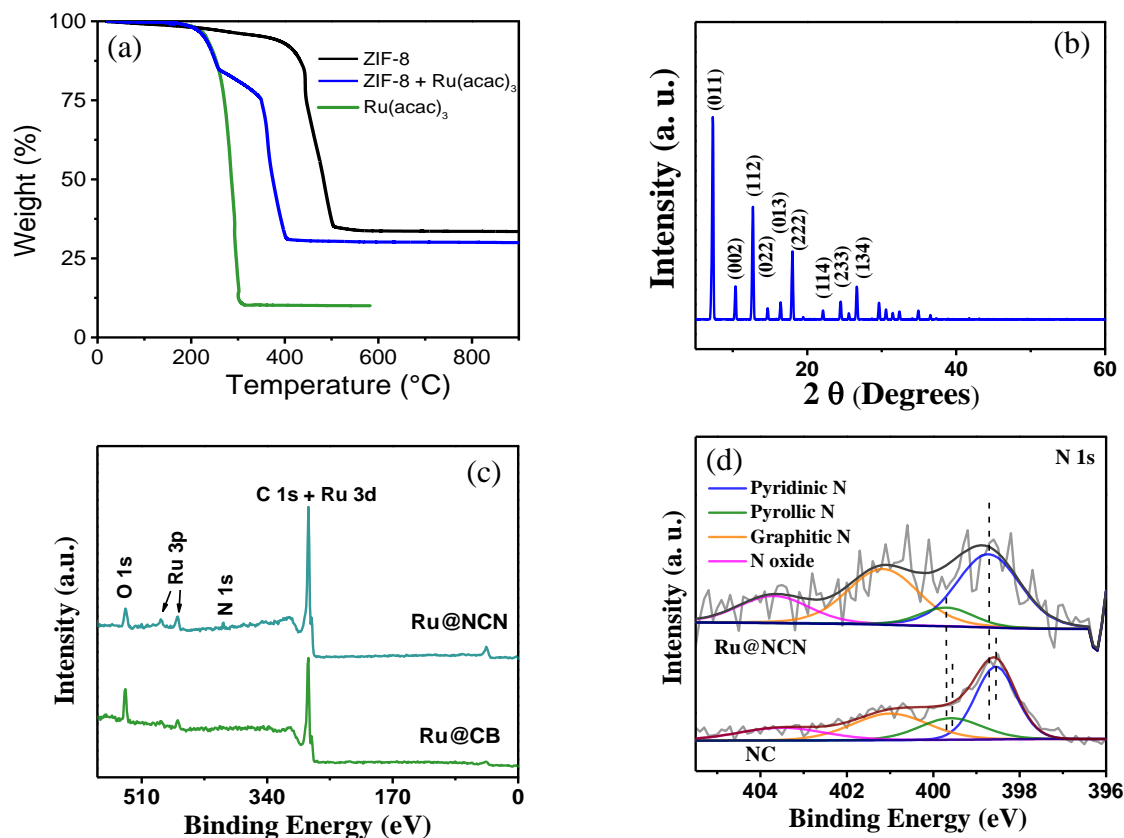

**Figure S1.** (a) TGA in  $N_2$  atmosphere of ZIF-8,  $Ru(acac)_3$  and the precursor mixture (ZIF-8 +  $Ru(acac)_3$ ) to obtain Ru@NCN, (b) XRD pattern of ZIF-8. (c) Survey XPS spectra of Ru@NCN and Ru@CB, and (d) HRXPS N 1s spectra of Ru@NCN and NC.

The TGA of the precursors (ZIF-8 and  $Ru(acac)_3$ ) is shown in Figure S1(a). The decomposition of  $Ru(acac)_3$  to  $RuO_2$  is marked by a steep fall at 175-300 °C with subsequent release of volatiles ( $CO$ ,  $CO_2$  and  $H_2O$ ) due to decomposition of acetylacetonate ligand.<sup>1, 2</sup> The TGA of ZIF-8 precursor displays a weight loss of ~ 4 % up to 300 °C that can be attributed to loss of  $H_2O$  and removal of guest molecules (unreacted imidazole ligand) adsorbed and trapped within ZIF-8. Further loss up to 390 °C is due to partial dissociation of the methyl groups. A rapid fall in the range 390-510 °C indicates the carbonization of ZIF-8 with removal of volatile  $CO_x$  and  $NO_x$ .<sup>3</sup> Now, when both the precursors are subjected to physical mixing (ZIF-8 +  $Ru(acac)_3$ ), a three-step dissociation is observed in the TGA. A weight loss of 16 % at ~ 260 °C occurs because of decomposition of  $Ru(acac)_3$  followed by partial dissociation of methyl groups till 350 °C. A total weight loss of 69 % is observed at 405 °C that marks the carbonization of the precursor.

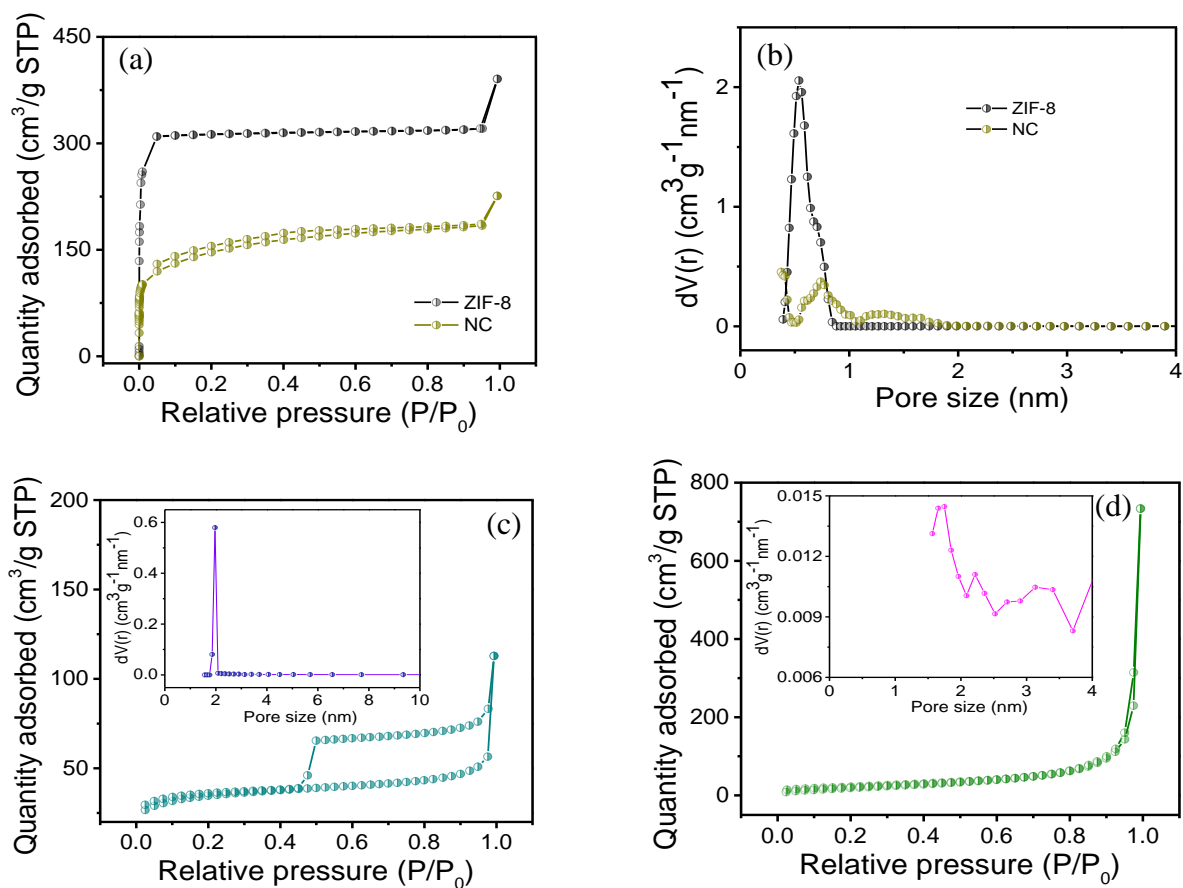

**Figure S2** N<sub>2</sub> adsorption/desorption isotherms for BET surface area and BJH plot for pore radius of (a, b) ZIF-8 and NC, (c) Ru@NCN and (d) Ru@CB.

**Table S1.** Specific surface area, average pore size and volume using BET-BJH method for different samples.

|        | Specific surface area<br>(m <sup>2</sup> /g) | Average pore size<br>(radius, nm) | Pore volume<br>(cc/g) |
|--------|----------------------------------------------|-----------------------------------|-----------------------|
| ZIF-8  | 1304.29                                      | 0.53                              | 0.46                  |
| NC     | 520.57                                       | 0.37                              | 0.28                  |
| Ru@NCN | 127.87                                       | 1.96                              | 0.15                  |
| Ru@CB  | 82.48                                        | 1.75                              | 1.14                  |

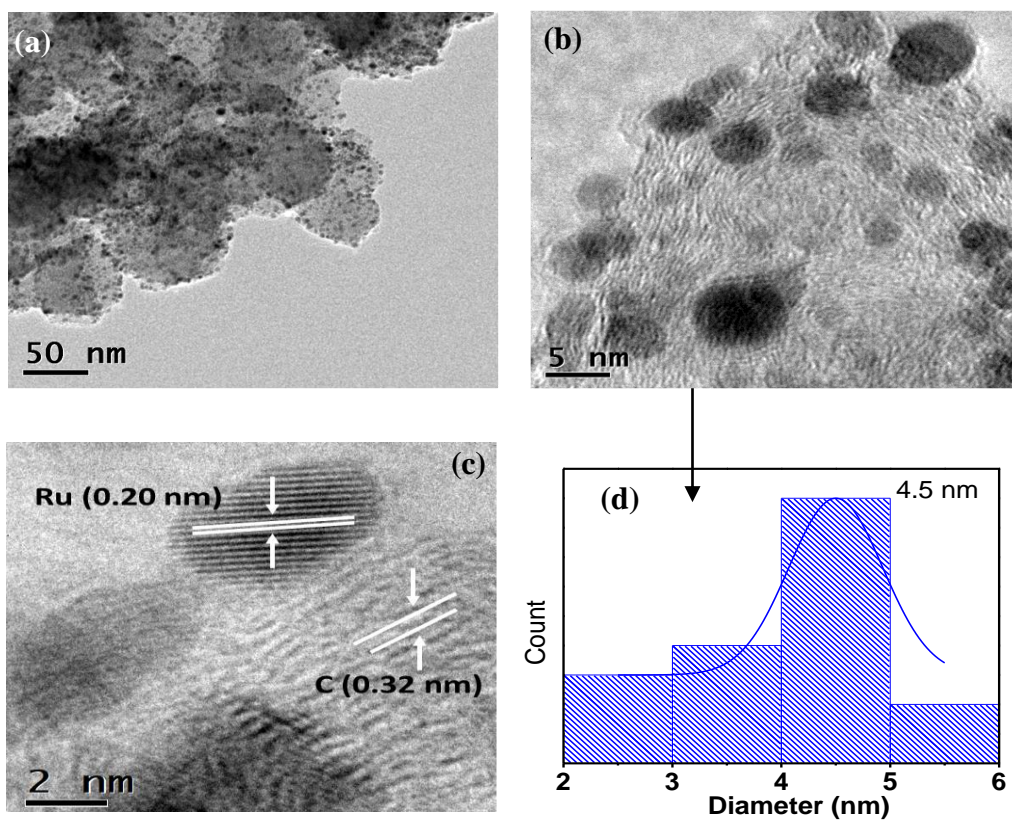

Figure S3 (a, b) TEM image, (c) HRTEM image and (d) size distribution curve of Ru@CB.

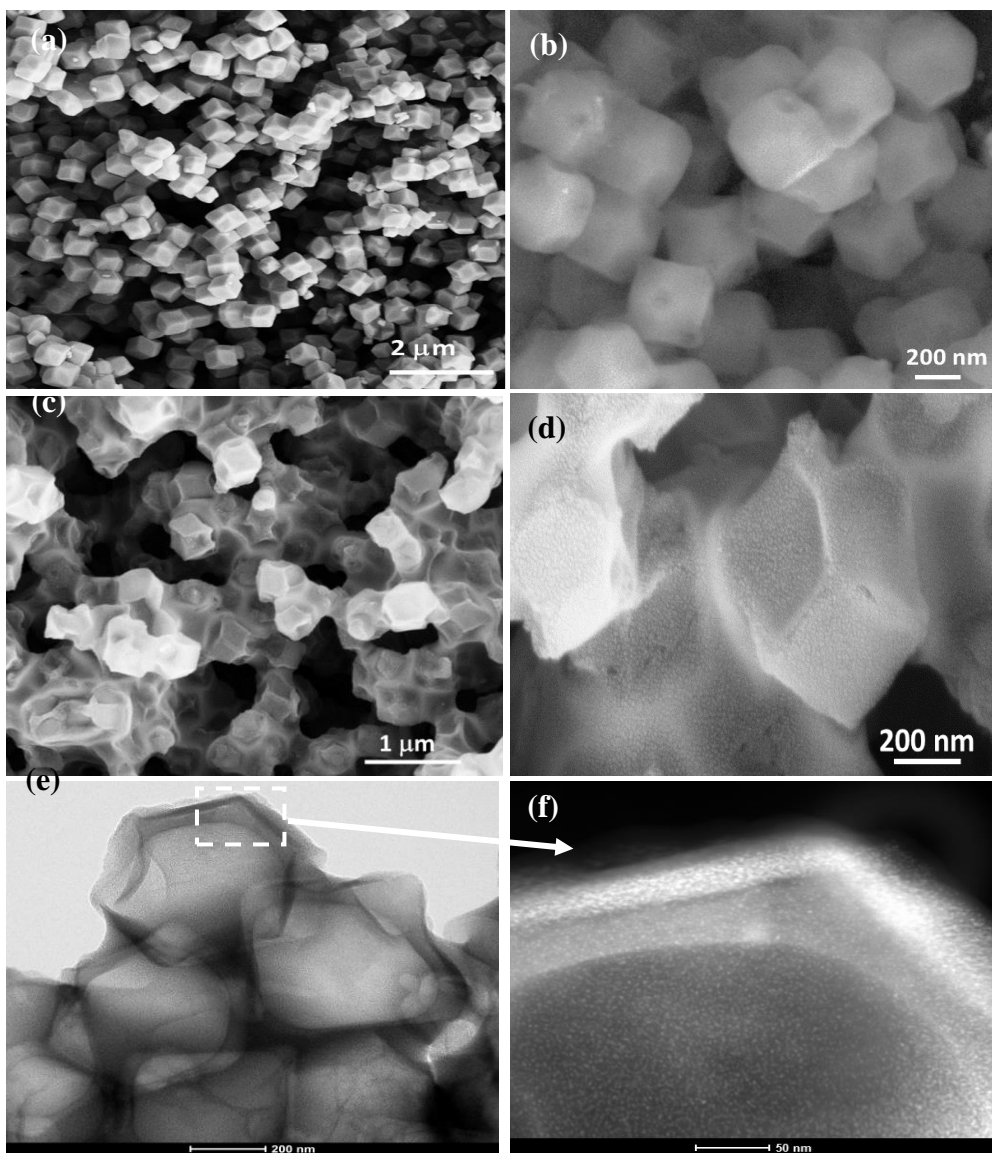

**Figure S4.** SEM image of (a) ZIF-8, (b) NC, (c, d) Ru@NCN, and (e) TEM image and (f) HAADF-STEM image of Ru@NCN.

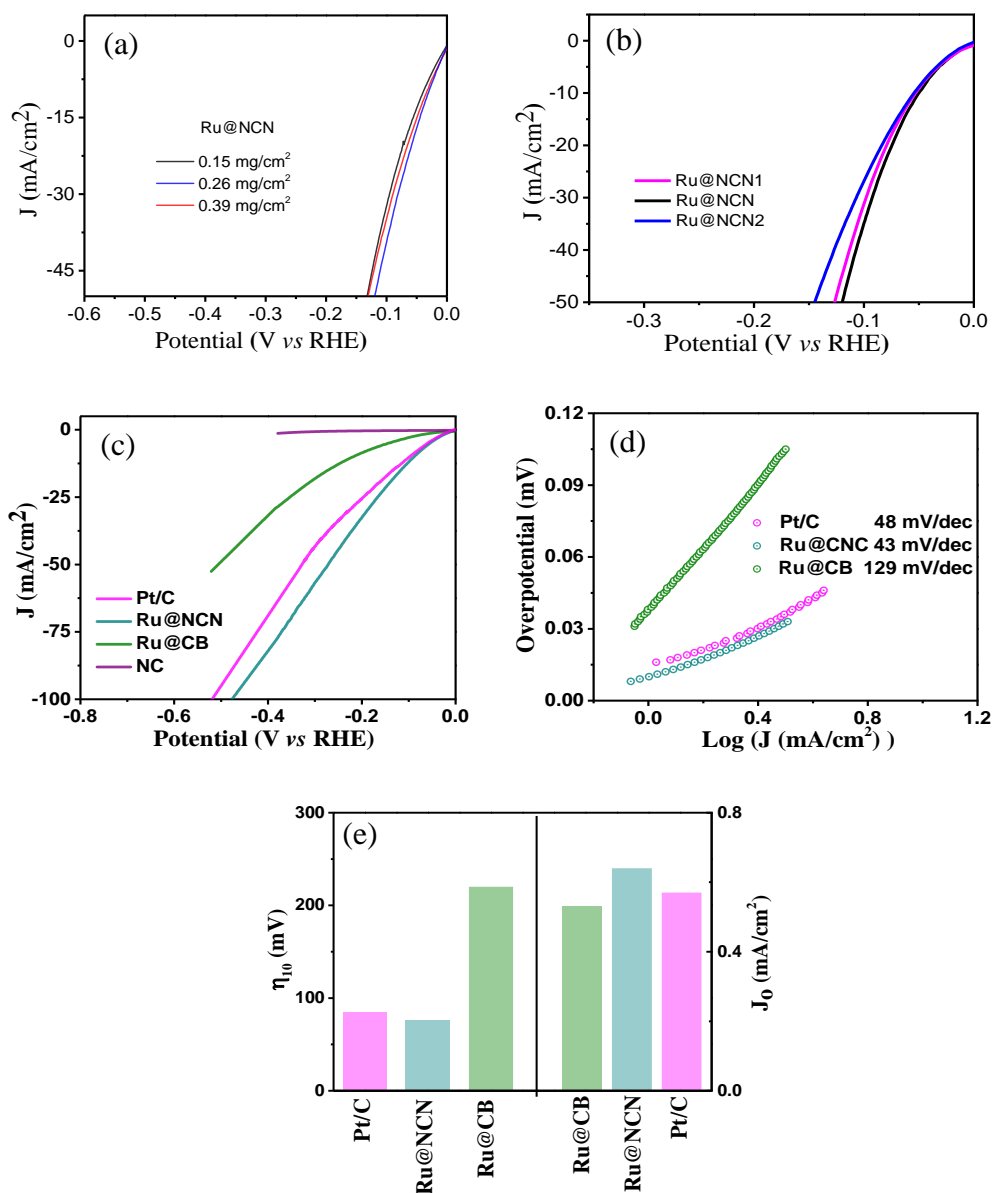

**Figure S5.** (a) Variation of HER activity with catalyst loading in 1 M KOH solution for Ru@NCN. The optimized loading is 0.26 mg/cm<sup>2</sup>. (b) LSV polarization curves of Ru@NCN with different precursor ratio for HER in 0.5 M H<sub>2</sub>SO<sub>4</sub>. (c) Comparison of HER polarization curve of as-synthesized samples with commercial 20 wt % Pt/C at a scan rate of 5 mV/s. (d) Tafel slope and (e) Bar graph depicting the overpotential required to reach the current density of 10 mA/cm<sup>2</sup> (left) and exchange current density,  $J_0$  (mA/cm<sup>2</sup>) for the samples (right) in 1 M PBS.



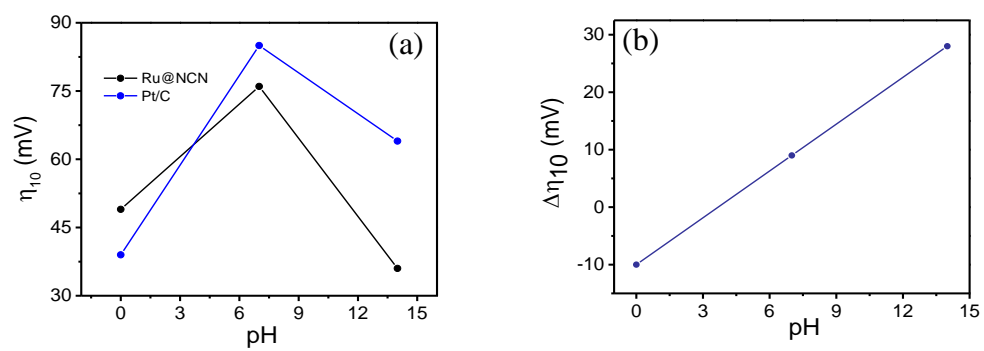

**Figure S6** (a) Variation of  $\eta_{10}$  (overpotential required to reach a current density of  $10 \text{ mA/cm}^2$ ) for Ru@NCN and Pt/C with changing pH. (b) Plot of  $\Delta\eta_{10}$  ( $\eta_{\text{Pt/C}} - \eta_{\text{Ru@NCN}}$ ) with change in pH.

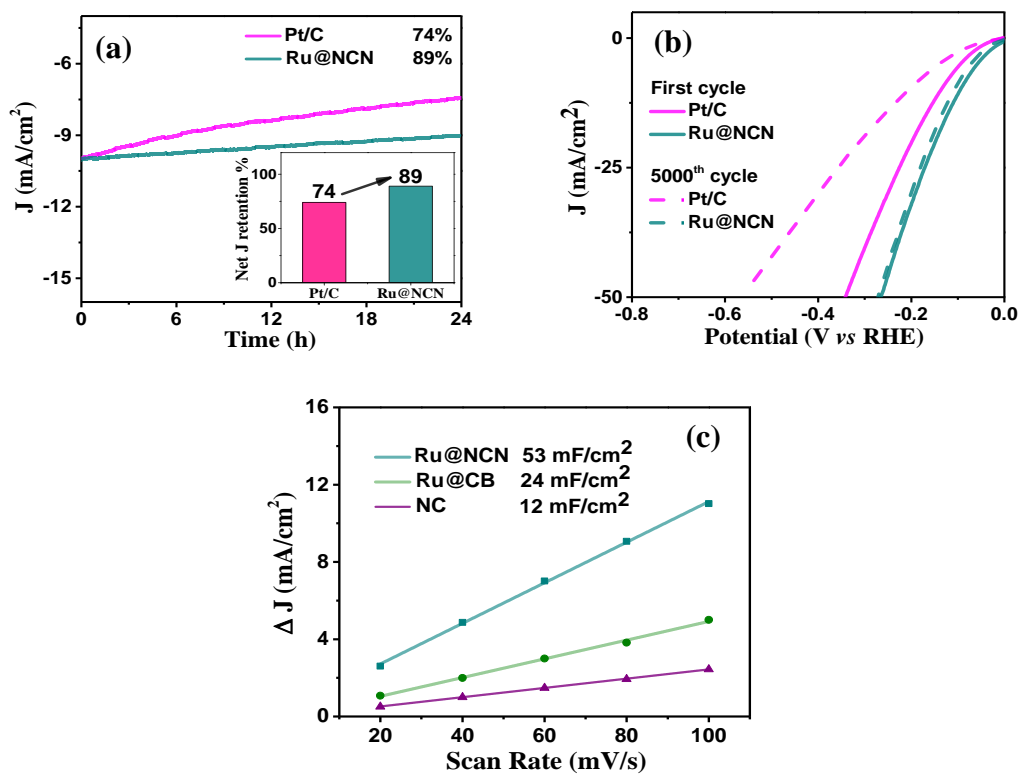

**Figure S7.** (a) Chronoamperometric studies done for a time duration of 24 h. inset- bar graph depicts the increase in the net current retention % from commercial Pt/C to as-synthesized Ru@NCN. (b) LSV curve after the first and 5000<sup>th</sup> cycle of the ADT at a scan rate of 100 mV/s for Pt/C and Ru@NCN. and (c)  $C_{dl}$  calculated from the CV curves studied in the non-faradaic region for the samples in 1 M PBS.

**Table S2.** Comparison of HER activity of as-synthesized catalyst with previously reported Ru-based catalysts in alkaline, acidic, and neutral media.

| Catalyst                                        |       | Loading<br>(mg/cm <sup>2</sup> ) | Medium                                          | E@10 mA/cm <sup>2</sup><br>(mV) | Tafel slope<br>(mV/dec) | Reference               |
|-------------------------------------------------|-------|----------------------------------|-------------------------------------------------|---------------------------------|-------------------------|-------------------------|
| <b><i>Ru@NCN</i></b>                            |       | <b><i>0.26</i></b>               | <b><i>1 M KOH</i></b>                           | <b><i>36</i></b>                | <b><i>33</i></b>        | <b><i>This work</i></b> |
| Ru-MoS <sub>2</sub> /CC                         |       | 12.4                             | 1 M KOH                                         | 41                              | 114                     | <sup>4</sup>            |
| Ru-NGC                                          |       | -                                |                                                 | 40                              | 65                      | <sup>5</sup>            |
| Ru/C <sub>3</sub> N <sub>4</sub> /C             |       | 0.204                            | 1 M KOH                                         | 79                              | -                       | <sup>6</sup>            |
| RuP <sub>2</sub> @NPC                           |       | 1.00                             | 1 M KOH                                         | 52                              | 69                      | <sup>7</sup>            |
| Ultrafine tube                                  | Ru/NG | 0.428                            | 1 M KOH                                         | 45                              | 81                      | <sup>8</sup>            |
| RuCo@NC                                         |       | 0.275                            | 1 M KOH                                         | 28                              | 31                      | <sup>9</sup>            |
| Ultrafine Ru/N-G                                |       | -                                | 1 M KOH                                         | 40                              | 76                      | <sup>10</sup>           |
| Ru@CN                                           |       | -                                | 1 M KOH                                         | 32                              | 53                      | <sup>11</sup>           |
| Pd-Ru@NG                                        |       | -                                | 1 M KOH                                         | 42                              | 73                      | <sup>12</sup>           |
| Ru/NC                                           |       | -                                |                                                 | 21                              | ~ 31                    | <sup>13</sup>           |
| <b><i>Ru@NCN</i></b>                            |       | <b><i>0.26</i></b>               | <b><i>0.5 M H<sub>2</sub>SO<sub>4</sub></i></b> | <b><i>49</i></b>                | <b><i>41</i></b>        | <b><i>This work</i></b> |
| Pd@Ru NRs                                       |       | -                                | 0.5 M H <sub>2</sub> SO <sub>4</sub>            | 37                              | 33                      | <sup>14</sup>           |
| Ru-HPC                                          |       | 0.2                              | 0.5 M H <sub>2</sub> SO <sub>4</sub>            | 61.6                            | 66.8                    | <sup>15</sup>           |
| 0.27-RuO <sub>2</sub> @C                        |       | -                                | 0.5 M H <sub>2</sub> SO <sub>4</sub>            | 33                              | 53                      | <sup>16</sup>           |
| s-RuS <sub>2</sub> /S-rGO                       |       | -                                | 0.5 M H <sub>2</sub> SO <sub>4</sub>            | 69                              | 64                      | <sup>17</sup>           |
| Ru <sub>x</sub> Fe <sub>y</sub> Se <sub>z</sub> |       | 0.8                              | 0.5 M H <sub>2</sub> SO <sub>4</sub>            | 85                              | 111                     | <sup>18</sup>           |

|                                      |             |                                      |           |           |                  |
|--------------------------------------|-------------|--------------------------------------|-----------|-----------|------------------|
| Ru <sub>x</sub> P                    | -           | 0.5 M H <sub>2</sub> SO <sub>4</sub> | 62        | 129       | 19               |
| Ru-based nanoparticles               | 0.12        | 0.5 M H <sub>2</sub> SO <sub>4</sub> | 65        | 100       | 20               |
| Ni <sub>43</sub> Ru <sub>57</sub>    | 0.28        | 0.5 M H <sub>2</sub> SO <sub>4</sub> | 41        | ~31       | 21               |
| <b>Ru@NCN</b>                        | <b>0.26</b> | <b>1 M PBS</b>                       | <b>76</b> | <b>43</b> | <b>This work</b> |
| Ru@Co-SAs/N-C                        | -           | 1 M PBS                              | 55        | 82        | 22               |
| RuP <sub>2</sub> @NPC                | 1           | 1 M PBS                              | 57        | 87        | 7                |
| Ru@CN-0.16                           | 0.048       | 1 M PBS                              | 100       | -         | 11               |
| Ru/MeOH/THF                          | 0.352       | 0.1 M PBS                            | 83        | 80        | 23               |
| 1D-RuO <sub>2</sub> -CN <sub>x</sub> | 0.17        | 0.1 M PBS                            | 356       | 135       | 24               |

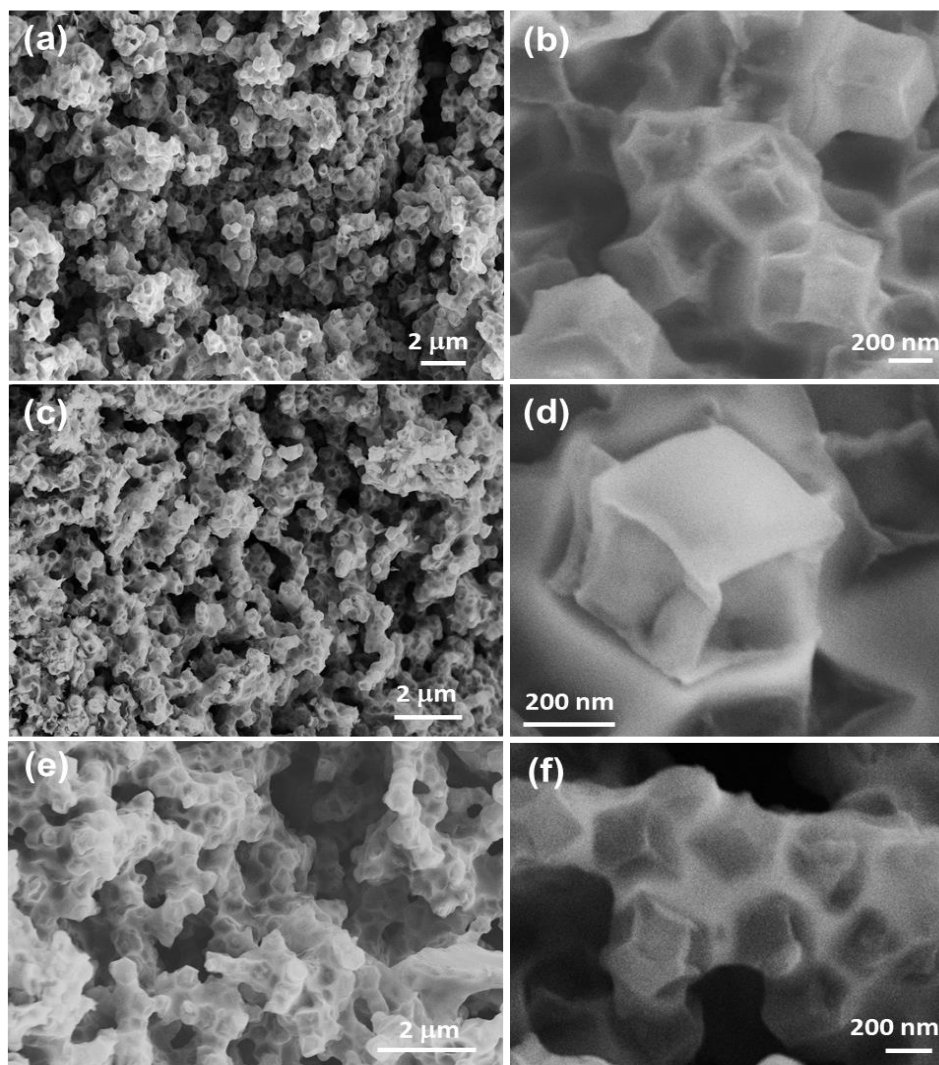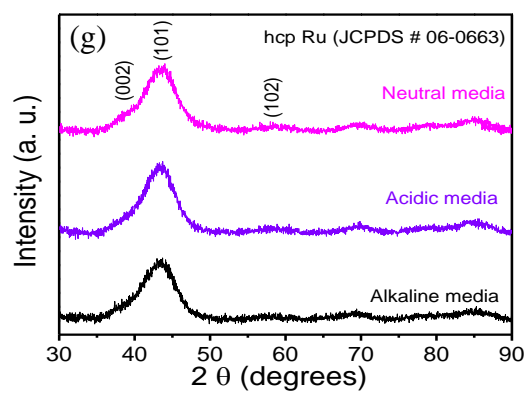

**Figure S8.** SEM images of Ru@NCN after stability test in (a, b) alkaline, (c, d) acidic, and (e, f) neutral media, (g) XRD pattern of Ru@NCN after stability testing in respective media.

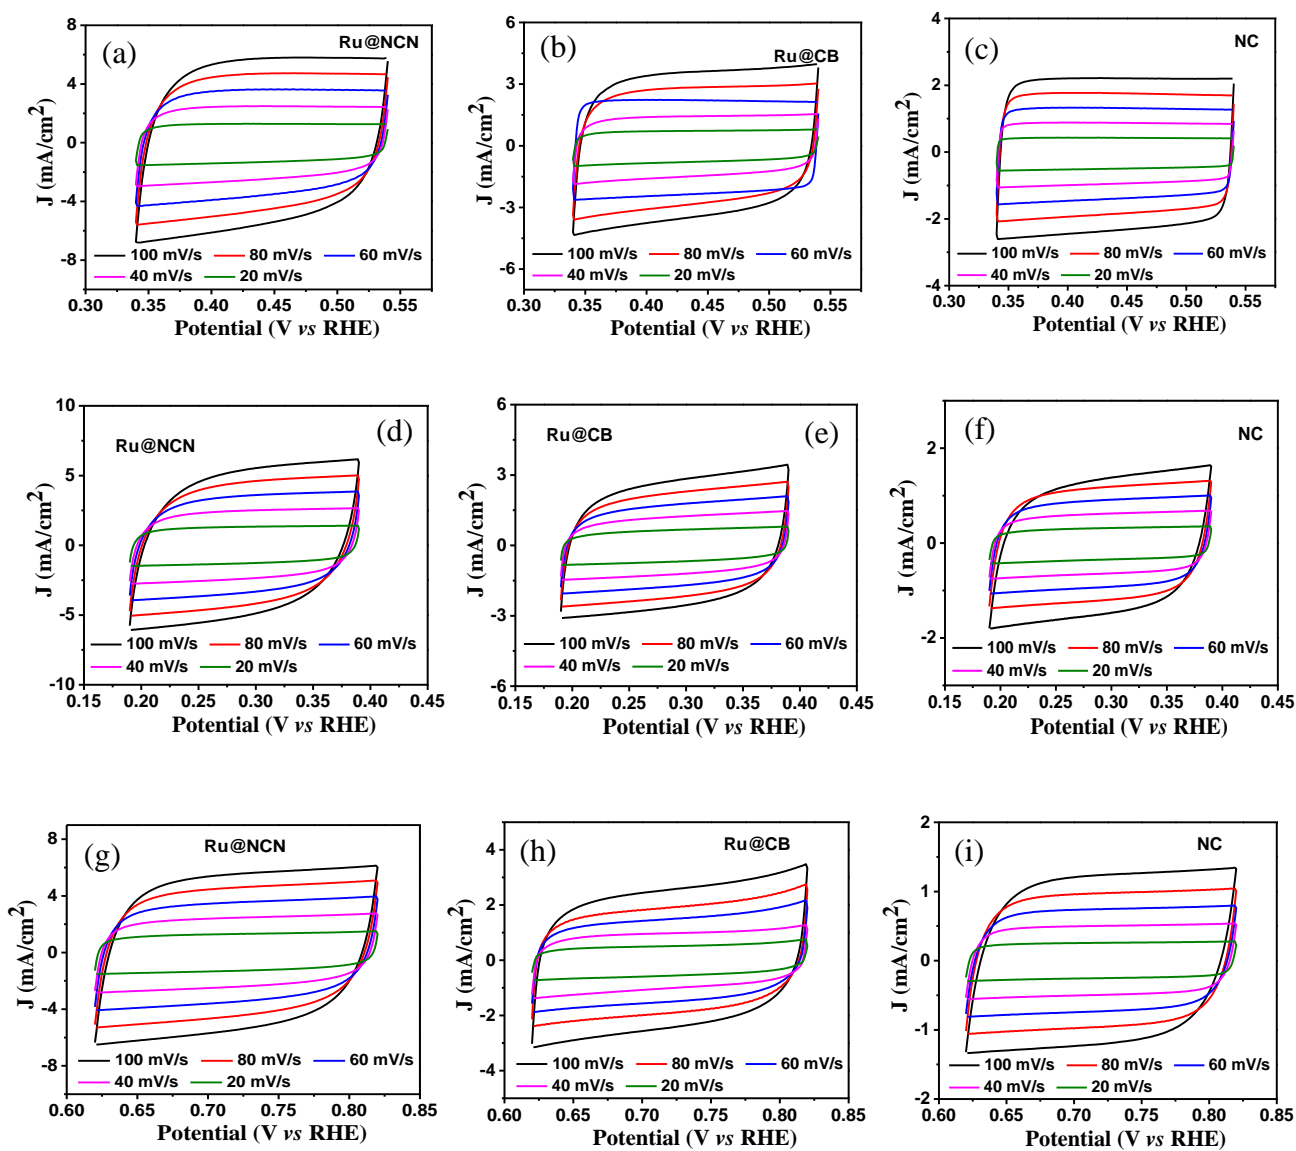

**Figure S9.** CV in the non-faradaic region at different scan rates (20 to 100 mV/s) to calculate the  $C_{dl}$  in (a-c) alkaline, (d-f) acidic, and (g-i) neutral media for Ru@NCN, Ru@CB and NC, respectively.

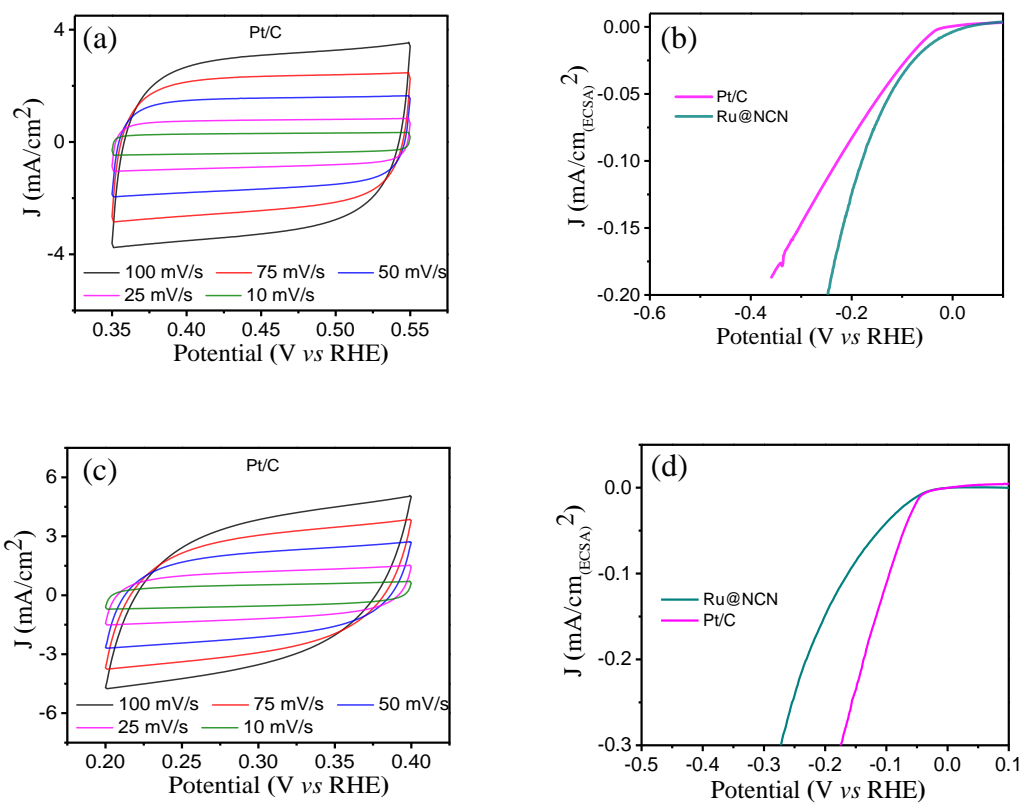

**Figure S10.** CV in the non-faradaic region at different scan rates (10 to 100 mV/s) to calculate the  $C_{dl}$  in (a) alkaline, (c) acidic media, ECSA normalized LSV polarization curve in (b) alkaline and (d) acidic media.

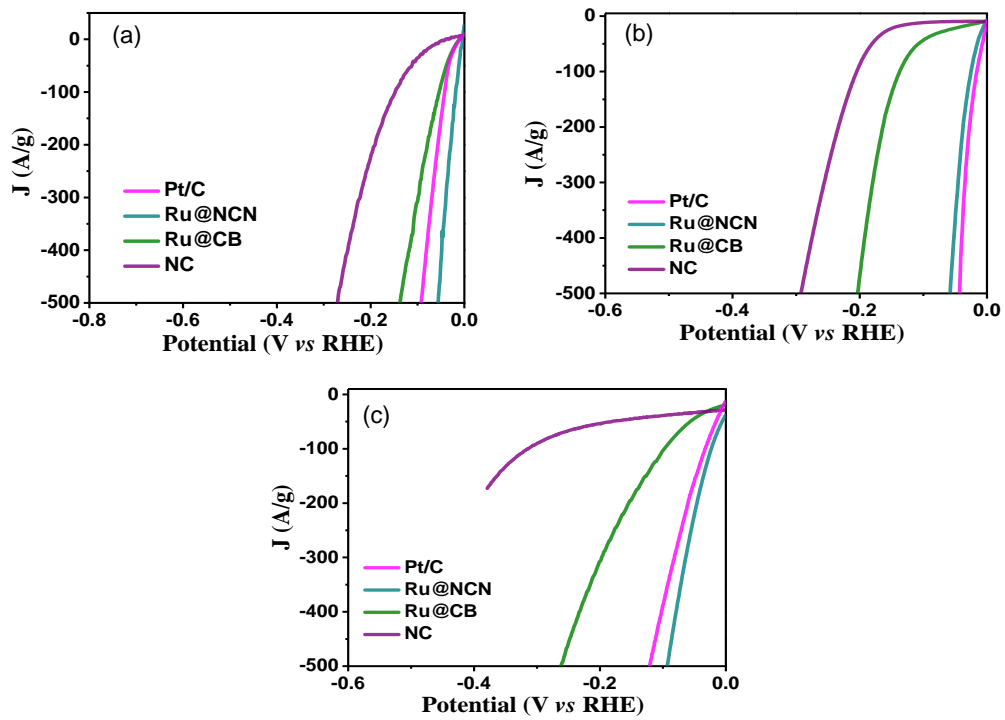

**Figure S11.** Mass normalized LSV in (a) alkaline, (b) acidic, and (c) neutral media.



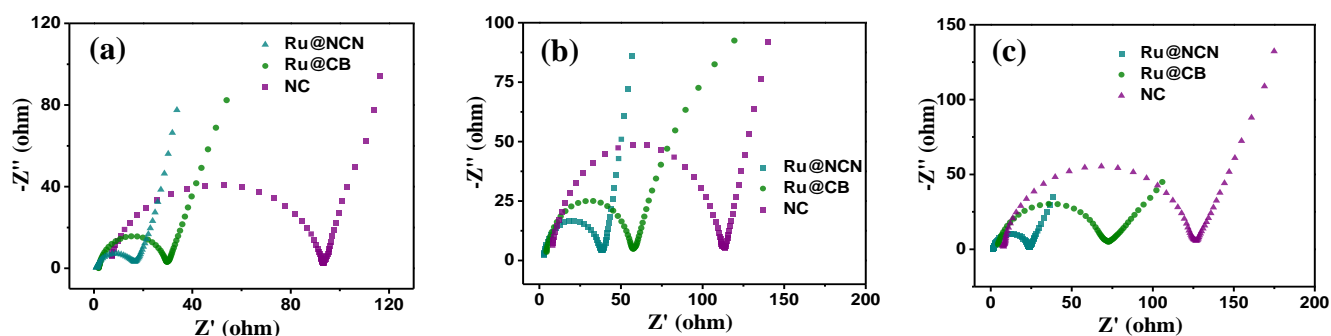

**Figure S12.** Nyquist plot for Ru@NCN, Ru@CB and NC in (a) alkaline (b) acidic and (c) neutral media.

**Table S3** Charge transfer ( $R_{ct}$ ) and solution ( $R_s$ ) resistance obtained from the Nyquist plots for the various catalysts in the universal pH range.

|               | $R_{ct} + R_s$ |              |               |
|---------------|----------------|--------------|---------------|
|               | Alkaline media | Acidic media | Neutral media |
| <b>Ru@NCN</b> | 17.3           | 38.7         | 24.3          |
| <b>Ru@CB</b>  | 29.4           | 58.1         | 73.9          |
| <b>NC</b>     | 92.9           | 113.0        | 128.2         |

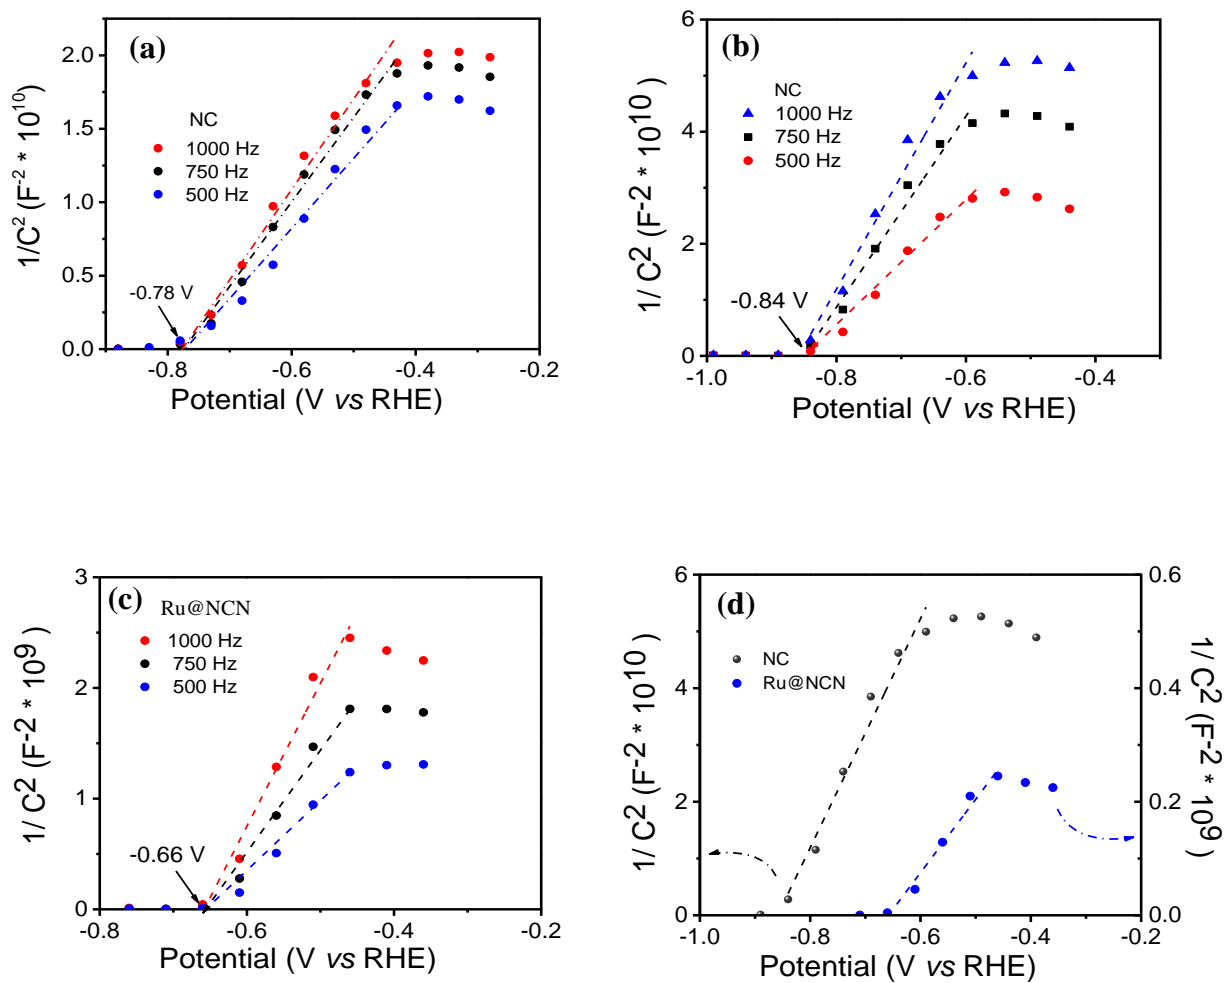

**Figure S13.** Mott-Schottky plots at different frequencies (1000, 750 and 500 Hz) for NC in (a) acidic media, (b) alkaline media, (c) Ru@NCN in alkaline media and (d) at a fixed frequency of 1000 Hz for NC and Ru@NCN in alkaline media.

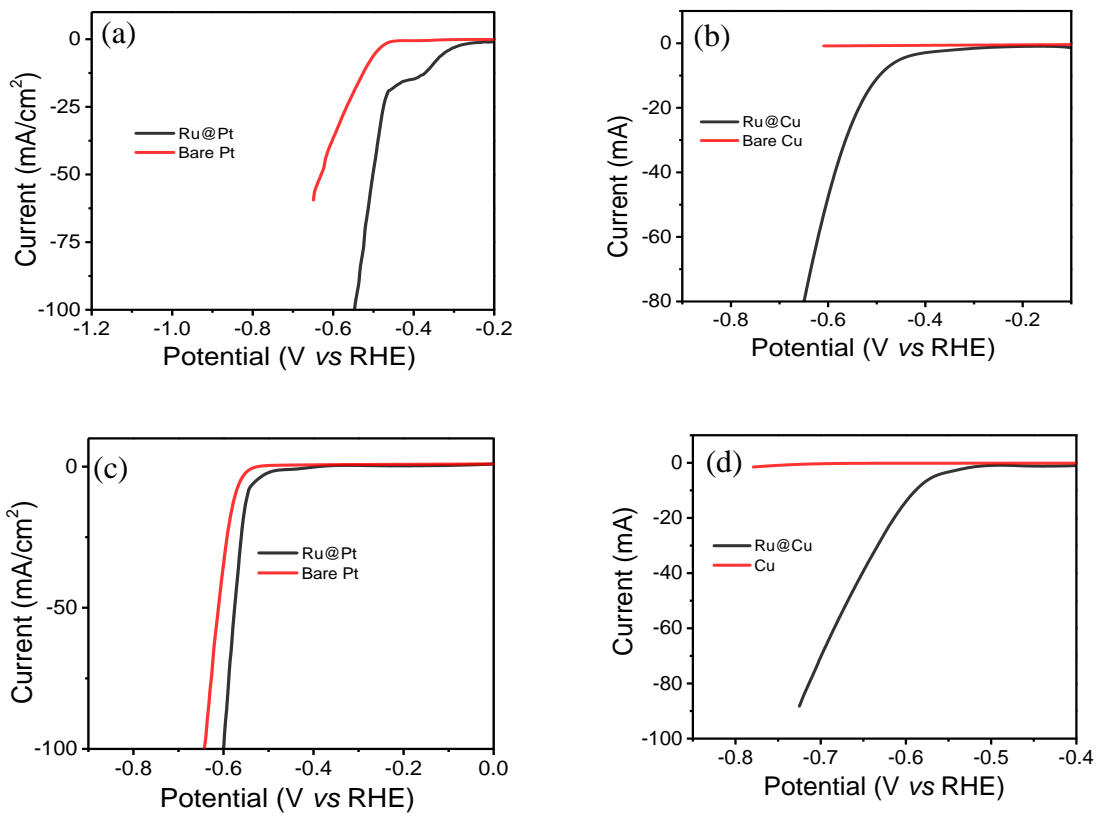

**Figure S14.** HER LSV polarization curves for the respective samples (Ru@Pt, Pt, Ru@Cu, Cu) in (a, b) 1 M KOH, (c, d) 0.5 M H<sub>2</sub>SO<sub>4</sub>

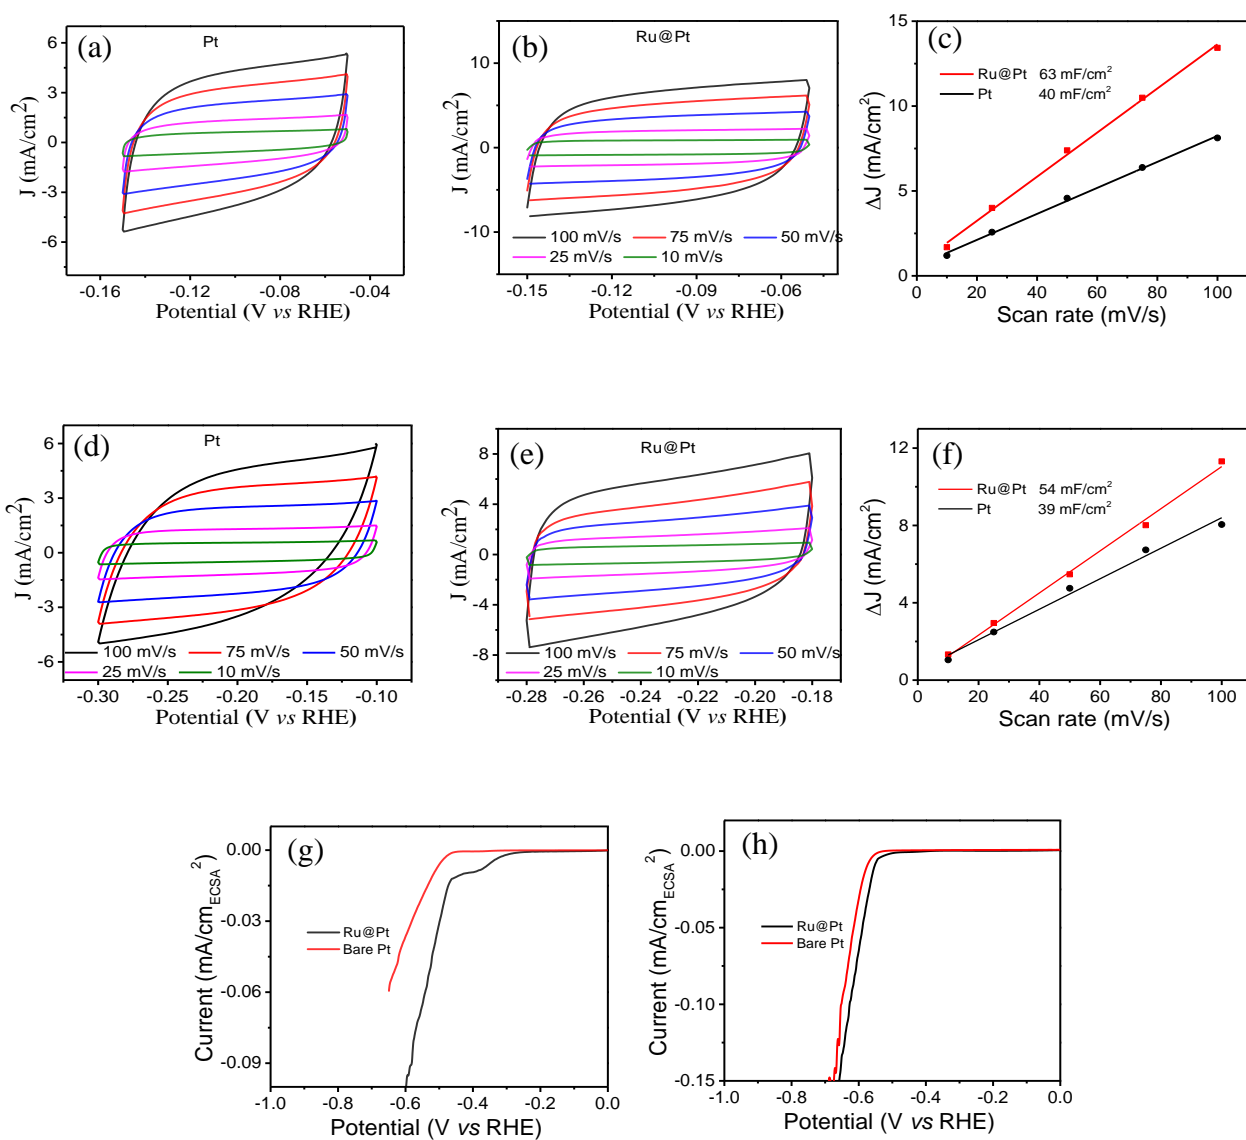

**Figure S15.** CV in the non-faradaic region at different scan rates (10 to 100 mV/s) to calculate the  $C_{dl}$  in (a-c) alkaline, (d-f) acidic media, ECSA normalized LSV polarization curve in (g) alkaline and (h) acidic media for Ru@Pt and bare Pt.

## References

1. A. F. Bykov, N. B. Morozova, I. K. Igumenov and S. V. Sysoev, *Journal of thermal analysis*, 1996, **46**, 1551-1565.
2. S. Musić, S. Popović, M. Maljković, K. Furić and A. Gajović, *Journal of Materials Science Letters*, 2002, **21**, 1131-1134.
3. J. B. James and Y. S. Lin, *The Journal of Physical Chemistry C*, 2016, **120**, 14015-14026.
4. D. Wang, Q. Li, C. Han, Z. Xing and X. Yang, *Applied Catalysis B: Environmental*, 2019, **249**, 91-97.
5. Q. Song, X. Qiao, L. Liu, Z. Xue, C. Huang and T. Wang, *Chemical Communications*, 2019, **55**, 965-968.
6. Y. Zheng, Y. Jiao, Y. Zhu, L. H. Li, Y. Han, Y. Chen, M. Jaroniec and S.-Z. Qiao, *Journal of the American Chemical Society*, 2016, **138**, 16174-16181.
7. Z. Pu, I. S. Amiinu, Z. Kou, W. Li and S. Mu, *Angewandte Chemie International Edition*, 2017, **56**, 11559-11564.
8. B. K. Barman, B. Sarkar, P. Ghosh, M. Ghosh, G. Mohan Rao and K. K. Nanda, *ACS Applied Energy Materials*, 2019, **2**, 7330-7339.
9. J. Su, Y. Yang, G. Xia, J. Chen, P. Jiang and Q. Chen, *Nature Communications*, 2017, **8**, 14969.
10. B. K. Barman, D. Das and K. K. Nanda, *Sustainable Energy & Fuels*, 2017, **1**, 1028-1033.
11. J. Wang, Z. Wei, S. Mao, H. Li and Y. Wang, *Energy & Environmental Science*, 2018, **11**, 800-806.
12. B. K. Barman, B. Sarkar and K. K. Nanda, *Chemical Communications*, 2019, **55**, 13928-13931.
13. J. Zhang, P. Liu, G. Wang, P. P. Zhang, X. D. Zhuang, M. W. Chen, I. M. Weidinger and X. L. Feng, *Journal of Materials Chemistry A*, 2017, **5**, 25314-25318.
14. Y. Luo, X. Luo, G. Wu, Z. Li, G. Wang, B. Jiang, Y. Hu, T. Chao, H. Ju, J. Zhu, Z. Zhuang, Y. Wu, X. Hong and Y. Li, *ACS Applied Materials & Interfaces*, 2018, **10**, 34147-34152.
15. T. Qiu, Z. Liang, W. Guo, S. Gao, C. Qu, H. Tabassum, H. Zhang, B. Zhu, R. Zou and Y. Shao-Horn, *Nano Energy*, 2019, **58**, 1-10.
16. H.-S. Park, J. Yang, M. K. Cho, Y. Lee, S. Cho, S.-D. Yim, B.-S. Kim, J. H. Jang and H.-K. Song, *Nano Energy*, 2019, **55**, 49-58.
17. J. Yu, Y. Guo, S. Miao, M. Ni, W. Zhou and Z. Shao, *ACS Applied Materials & Interfaces*, 2018, **10**, 34098-34107.
18. R. G. González-Huerta, J. A. Chávez-Carvayar and O. Solorza-Feria, *Journal of Power Sources*, 2006, **153**, 11-17.
19. H. Teller, O. Krichevski, M. Gur, A. Gedanken and A. Schechter, *ACS Catalysis*, 2015, **5**, 4260-4267.
20. S. Durón, R. Rivera-Noriega, P. Nkeng, G. Poillerat and O. Solorza-Feria, *Journal of Electroanalytical Chemistry*, 2004, **566**, 281-289.
21. C. Zhang, Y. Liu, Y. Chang, Y. Lu, S. Zhao, D. Xu, Z. Dai, M. Han and J. Bao, *ACS Applied Materials & Interfaces*, 2017, **9**, 17326-17336.
22. S. Yuan, Z. Pu, H. Zhou, J. Yu, I. S. Amiinu, J. Zhu, Q. Liang, J. Yang, D. He, Z. Hu, G. Van Tendeloo and S. Mu, *Nano Energy*, 2019, **59**, 472-480.
23. S. Drouet, J. Creus, V. Collière, C. Amiens, J. García-Antón, X. Sala and K. Philippot, *Chemical Communications*, 2017, **53**, 11713-11716.
24. T. Bhowmik, M. K. Kundu and S. Barman, *ACS Applied Materials & Interfaces*, 2016, **8**, 28678-28688.
